# Supplementary material for: Characterization of Three Novel SXT/R391 Integrating Conjugative Elements ICEMfuInd1a and ICEMfuInd1b, and ICEMprChn1 Identified in the Genomes of Marinomonas fungiae JCM 18476T and Marinomonas profundimaris Strain D104
Source: PubMed Central journal article supplement (PMC5122569; doi:10.3389/fmicb.2016.01896), 2016-11-25
Supplement: DataSheet1.pdf [file DataSheet1.pdf]

1  
2  
3  
4  
5  
6  
7  
8  
9  
10  
11  
12  
13  
14  
15  
16  
17  
18  
19  
20  
21

## SUPPLEMENTARY MATERIALS

**Characterization of three novel SXT/R391 integrating conjugative elements ICEMfuInd1a and ICEMfuInd1b, and ICEMprChn1 identified in the genomes of *Marinomonas fungiae* JCM 18476<sup>T</sup> and *Marinomonas profundimaris* strain D104.**

**Journal:** Frontiers in Microbiology

**Authors:** Jhasketan Badhai and Subrata K Das\*

**Addresses:** Department of Biotechnology, Institute of Life Sciences, Nalco Square, Bhubaneswar, India.

**\*Correspondence:**

Institute of Life Sciences

Department of Biotechnology

Nalco Square, Bhubaneswar 751023 India

E-mail: subratkdas@hotmail.com; subrata@ils.res.in

Phone: (+91) 674 230 3342

Fax: (+91) 674 230 0728

|             |                                                                                                         |
|-------------|---------------------------------------------------------------------------------------------------------|
| STXM010     | GCT CTG TTT GGC GGC GGA TGA CCT AGT CAA AAA AAT CGA GAC GCG AAA CGT CGT TTG CAT TCT GGC CTG AAC TCG CCA |
| ICEVchInd4  | .....                                                                                                   |
| ICEPdaSpa1  | .....                                                                                                   |
| ICEPmiChn1  | .....T.G.....C.....T.....T.....                                                                         |
| ICEMfuInd1b | .....A.....C.....                                                                                       |
| ICESpuPO1   | ..G.....TG..C.....                                                                                      |
| ICEVfIInd1  | .....T.G.....C.....T.....                                                                               |
| ICEMprChn1  | .....A.TG..C.....T.....                                                                                 |
| R391        | .....T.....TG..C.....                                                                                   |
| ICEVchMex1  | .....                                                                                                   |
| ICEPaIBan1  | .....T.G.....C.....T.....T.....                                                                         |
| ICEVchBan5  | .....T.G.....C.....T.....T.....                                                                         |
| ICEVchInd5  | .....T.G.....C.....T.....T.....                                                                         |
| ICEMfuInd1a | .....T.....T.....                                                                                       |
| STXM010     | AAC GGT TTG TAT CTT CAT GAC GAT ACG TCG TTT TAG GCG TTT TTA AGT GAA ATC GGG CTG TAT CCC TTG TCA GGT ATG |
| ICEVchInd4  | .....                                                                                                   |
| ICEPdaSpa1  | .....                                                                                                   |
| ICEPmiChn1  | .....G.....T.....T.....A.C.....G.....                                                                   |
| ICEMfuInd1b | .....T.....G.A.....T.....C.....C.....                                                                   |
| ICESpuPO1   | .....T.....                                                                                             |
| ICEVfIInd1  | .....G.....T.....T.....A.C.....G.....                                                                   |
| ICEMprChn1  | .....T.....T.....                                                                                       |
| R391        | .....G.....T.....C.....A.....A.....T.....                                                               |
| ICEVchMex1  | .....T.....T.....                                                                                       |
| ICEPaIBan1  | .....G.....T.....T.....A.C.....G.....                                                                   |
| ICEVchBan5  | .....G.....T.....T.....A.C.....G.....                                                                   |
| ICEVchInd5  | .....G.....T.....T.....A.C.....G.....                                                                   |
| ICEMfuInd1a | .....T.....G.....T.....C.....C.....                                                                     |
| STXM010     | GGA TTG CGC GAG TTG ATT TAT ATC GAG ACG CCA AAC AGT GAT TGT TAC GGC AGT TTT ACG TTT GGC GTT TCG ATC CAA |
| ICEVchInd4  | .....                                                                                                   |
| ICEPdaSpa1  | .....                                                                                                   |
| ICEPmiChn1  | .....A.....C.....G.....                                                                                 |
| ICEMfuInd1b | .....                                                                                                   |
| ICESpuPO1   | .....G.....T.....                                                                                       |
| ICEVfIInd1  | .....A.....C.....G.....C.....                                                                           |
| ICEMprChn1  | ..G.....C.....                                                                                          |
| R391        | .....                                                                                                   |
| ICEVchMex1  | .....                                                                                                   |
| ICEPaIBan1  | .....A.....C.....G.....                                                                                 |
| ICEVchBan5  | .....A.....C.....G.....                                                                                 |
| ICEVchInd5  | .....A.....C.....G.....                                                                                 |
| ICEMfuInd1a | .....                                                                                                   |
| STXM010     | AAG CCA AAC GGA TAG TGG TTT TGG CTT TTG GCG TTA ATT GGA TGG GGA AAT TGG TTT GGT AGA AA                  |
| ICEVchInd4  | .....                                                                                                   |
| ICEPdaSpa1  | .....                                                                                                   |
| ICEPmiChn1  | .....A.....                                                                                             |
| ICEMfuInd1b | .....T.....                                                                                             |
| ICESpuPO1   | .....G..A.....                                                                                          |
| ICEVfIInd1  | .....A.....                                                                                             |
| ICEMprChn1  | .....                                                                                                   |
| R391        | .....A.....T.....                                                                                       |
| ICEVchMex1  | .....                                                                                                   |
| ICEPaIBan1  | .....A.....                                                                                             |
| ICEVchBan5  | .....A.....                                                                                             |
| ICEVchInd5  | .....A.....                                                                                             |
| ICEMfuInd1a | .....                                                                                                   |

Fig. S1

23 **Supplementary Figure S1.** ClustalW alignment on MEGA6 of the 299-bp long putative *oriT* DNA sequence located within the  
24 intergenic region *srpM-mobI* in ICEMfuInd1a, ICEMfuInd1b and ICEMprChn1 with the corresponding sequences from 11 reference  
25 SXT/R391 ICEs. Reference sequences were retrieved from the GenBank: SXT<sup>MO10</sup> (*V. cholerae* O139; accession: AY055428),  
26 ICEVchInd4 (*V. cholerae* O139; accession: GQ463141), ICEVchInd5 (*V. cholerae* O1; accession: GQ463142), ICEVchBan5 (*V.*  
27 *cholerae* O1; accession: GQ463140), ICEVchMex1 (*V. cholerae* non O139; accession: GQ463143), R391 (*Providencia rettgeri*;  
28 accession: AY090559), ICEPalBan1 (*Providencia alcalifaciens*; accession: GQ463139), ICEVflInd1 (*V. fluvialis*; accession:  
29 GQ463144), ICEPdaSpa1 (*Photobacterium damsela*; accession: AJ870986), ICESpuPO1 (*Shewanella putrefaciens*; accession:  
30 CP000503), and ICEPmiChn1 (*Proteus mirabilis*; accession: KT962845).

31  
32  
33  
34  
35  
36  
37  
38  
39  
40  
41  
42  
43  
44  
45  
46  
47  
48  
49  
50  
51

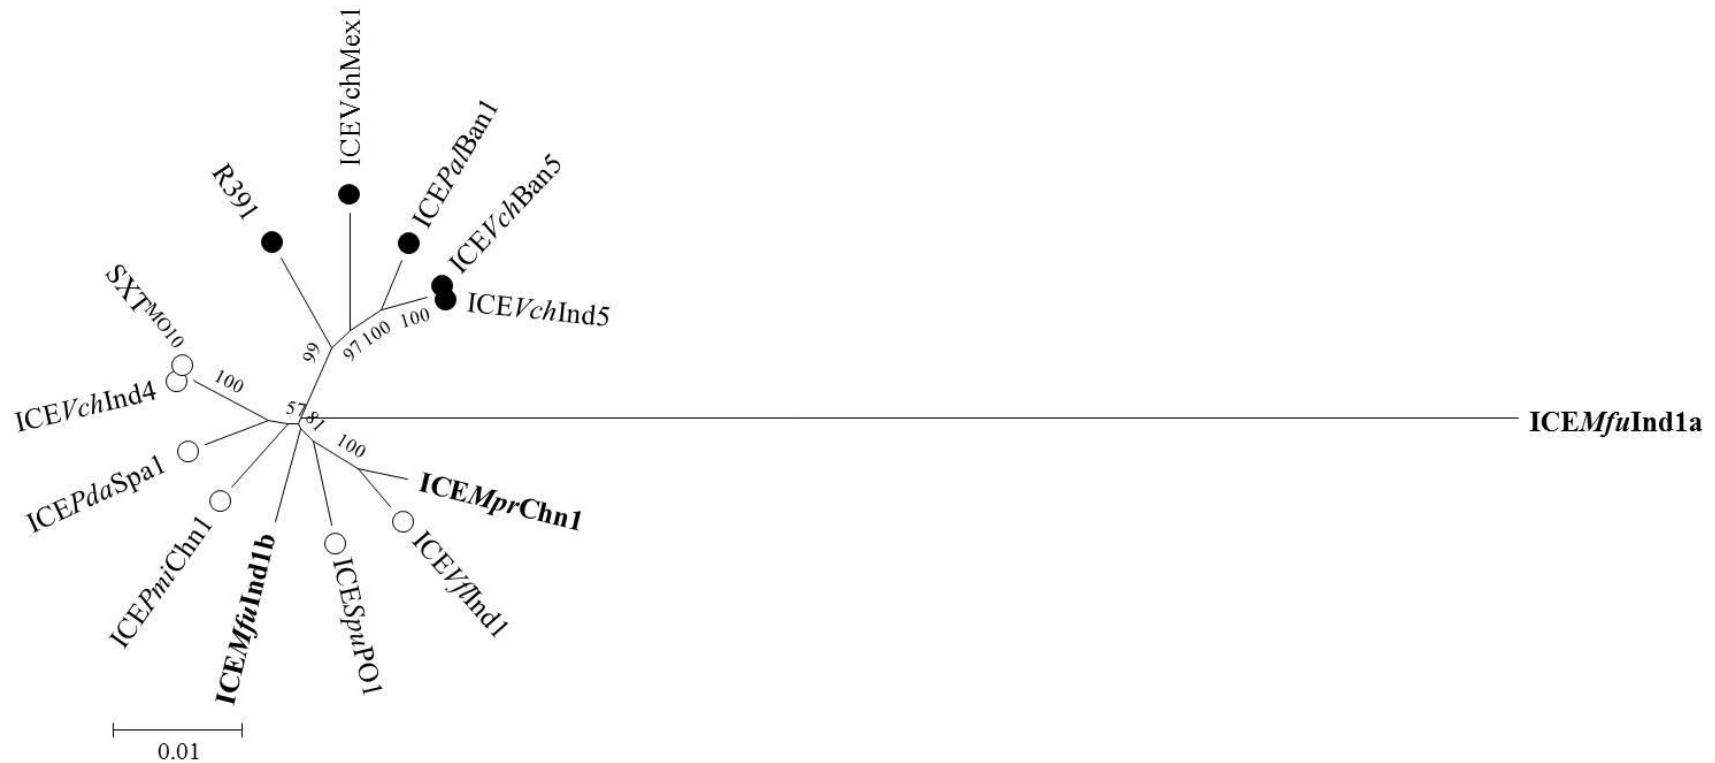

53

54

55 **Supplementary Figure S2.** Phylogenetic analysis of core ICE genes encoded proteins. The unrooted tree was constructed by  
 56 applying the Maximum Likelihood method based on the Poisson correction model using the MEGA6. Bootstrap analysis with 1000  
 57 replications was performed to test the reliability of the tree. (●), ICEs of the R391 exclusion group; (○), ICEs of the SXT exclusion  
 58 group.

59

60

61

62

63 **Supplementary Table S1.** Predicted core genes or ORFs present in the SXT-like ICEs: **(A)**, ICEMfuInd1a and **(B)**, ICEMfuInd1b  
 64 derived from the genome of *M. fungiae* JCM 18476<sup>T</sup>; and **(C)**, ICEMprChn1 of *M. profundimaris* strain D104.

65

66 **(A)** Core genes in ICEMfuInd1a

| ICEMfuInd1a gene/ORF id | Putative gene product name               | SXT/R391 equivalent gene | GenBank accession no. of <i>M. fungiae</i> genomic scaffolds encoding the ICE |
|-------------------------|------------------------------------------|--------------------------|-------------------------------------------------------------------------------|
| Ga0061065_11949         | Transcriptional regulator, AlpA family   | <i>xis</i>               | LIQF01000019.1                                                                |
| Ga0061065_11948*        | Integrase, N-terminal region             | <i>int</i>               | LIQF01000019.1                                                                |
| Ga0061065_11947*        | Integrase                                | <i>int</i>               | LIQF01000019.1                                                                |
| Ga0061065_11946         | Hypothetical protein                     | <i>srpR</i>              | LIQF01000019.1                                                                |
| Ga0061065_11945         | Plasmid segregation protein              | <i>srpM</i>              | LIQF01000019.1                                                                |
| Ga0061065_11944         | Hypothetical protein                     | <i>mobI</i>              | LIQF01000019.1                                                                |
| Ga0061065_11943         | DNA PolV/UmuCDNA repair protein          | <i>rumB</i>              | LIQF01000019.1                                                                |
| Ga0061065_11942         | DNA PolV/UmuDDNA repair protein          | <i>rumA</i>              | LIQF01000019.1                                                                |
| Ga0061065_11941         | DNA polymerase-3 subunit epsilon         | <i>s024</i>              | LIQF01000019.1                                                                |
| Ga0061065_11940         | Hypothetical protein                     | <i>s025</i>              | LIQF01000019.1                                                                |
| Ga0061065_11939         | WYL domain containing protein            | <i>s026</i>              | LIQF01000019.1                                                                |
| Ga0061065_11932         | Conjugal transfer pilus assembly protein | <i>traI</i>              | LIQF01000019.1                                                                |
| Ga0061065_11931         | Conjugal transfer pilus assembly protein | <i>traD</i>              | LIQF01000019.1                                                                |
| Ga0061065_11930         | Conjugal transfer pilus assembly protein | <i>s091</i>              | LIQF01000019.1                                                                |
| Ga0061065_11929         | Conjugal transfer pilus assembly protein | <i>s043/traJ</i>         | LIQF01000019.1                                                                |
| Ga0061065_11926         | Conjugal transfer pilus assembly protein | <i>traL</i>              | LIQF01000019.1                                                                |
| Ga0061065_11925         | Conjugal transfer pilus assembly protein | <i>traE</i>              | LIQF01000019.1                                                                |
| Ga0061065_11924         | Conjugal transfer pilus assembly protein | <i>traK</i>              | LIQF01000019.1                                                                |
| Ga0061065_11923         | Conjugal transfer pilus assembly protein | <i>traB</i>              | LIQF01000019.1                                                                |
| Ga0061065_11922         | Conjugal transfer pilus assembly protein | <i>traV</i>              | LIQF01000019.1                                                                |
| Ga0061065_11921         | Conjugal transfer pilus assembly protein | <i>traA</i>              | LIQF01000019.1                                                                |
| Ga0061065_11914         | Thiol:disulfide interchange protein      | <i>s054/dsbC</i>         | LIQF01000019.1                                                                |
| Ga0061065_11913         | Type-IV secretion system protein         | <i>traC</i>              | LIQF01000019.1                                                                |
| Ga0061065_11912         | Conserved hypothetical protein           | <i>orf92</i>             | LIQF01000019.1                                                                |
| Ga0061065_11911         | Conjugal transfer pilin signal peptidase | <i>trhF</i>              | LIQF01000019.1                                                                |
| Ga0061065_11910         | Conjugal transfer pilus assembly protein | <i>traW</i>              | LIQF01000019.1                                                                |
| Ga0061065_1199          | Conjugal transfer pilus assembly protein | <i>traU</i>              | LIQF01000019.1                                                                |
| Ga0061065_1198          | Conjugal transfer pilus assembly protein | <i>traN</i>              | LIQF01000019.1                                                                |
| Ga0061065_1196          | Hypothetical protein                     | <i>s063</i>              | LIQF01000019.1                                                                |

| ICEM <sub>fu</sub> Ind1a gene/ORF id | Putative gene product name                          | SXT/R391 equivalent gene | GenBank accession no. of <i>M. fungiae</i> genomic scaffolds encoding the ICE |
|--------------------------------------|-----------------------------------------------------|--------------------------|-------------------------------------------------------------------------------|
| Ga0061065_1195                       | Hypothetical protein                                | <i>s089</i>              | LIQF01000019.1                                                                |
| Ga0061065_1194                       | Single strand binding protein                       | <i>ssb</i>               | LIQF01000019.1                                                                |
| Ga0061065_1193                       | Phage recombination protein                         | <i>bet</i>               | LIQF01000019.1                                                                |
| Ga0061065_1192                       | Putative phage-type endonuclease                    | <i>exo</i>               | LIQF01000019.1                                                                |
| Ga0061065_1191                       | AAA-ATPase domain, CobS                             | <i>s067</i>              | LIQF01000019.1                                                                |
| Ga0061065_1331                       | Hypothetical protein                                | <i>s073</i>              | LIQF01000033.1                                                                |
| Ga0061065_1333                       | Conjugal transfer pilus assembly protein            | <i>traF</i>              | LIQF01000033.1                                                                |
| Ga0061065_1334                       | Conjugal transfer pilus assembly protein            | <i>traH</i>              | LIQF01000033.1                                                                |
| Ga0061065_1335*                      | TraG-like protein, N-terminal region                | <i>traG</i>              | LIQF01000033.1                                                                |
| Ga0061065_11487*                     | Conjugal transfer mating pair stabilization protein | <i>traG</i>              | LIQF01000033.1                                                                |
| Ga0061065_11486                      | Entry exclusion protein                             | <i>eex</i>               | LIQF01000014.1                                                                |
| Ga0061065_11485                      | Flagellar transcriptional activator (FlhC)          | <i>setC</i>              | LIQF01000014.1                                                                |
| Ga0061065_11484                      | Flagellar transcriptional activator (FlhD)          | <i>setD</i>              | LIQF01000014.1                                                                |
| Ga0061065_11483                      | Transglycosylase SLT domain containing protein      | <i>s082</i>              | LIQF01000014.1                                                                |
| Ga0061065_11482                      | Hypothetical protein                                | <i>s083</i>              | LIQF01000014.1                                                                |
| Ga0061065_11481                      | Hypothetical protein                                | <i>s084</i>              | LIQF01000014.1                                                                |
| Ga0061065_11480                      | Putative antitoxin of toxin-antitoxin system        | <i>croS/setQ</i>         | LIQF01000014.1                                                                |
| Ga0061065_11479                      | Phage repressor protein                             | <i>setR</i>              | LIQF01000014.1                                                                |

67

68 (B) Core genes in ICEM<sub>fu</sub>Ind1b

| ICEM <sub>fu</sub> Ind1b gene/ORF id | Putative gene product name               | SXT/R391 equivalent gene | GenBank accession no. of <i>M. fungiae</i> genomic scaffolds encoding the ICEs |
|--------------------------------------|------------------------------------------|--------------------------|--------------------------------------------------------------------------------|
| Ga0061065_12222                      | Integrase                                | <i>int</i>               | LIQF01000022.1                                                                 |
| Ga0061065_12221                      | Hypothetical protein                     | <i>srpR</i>              | LIQF01000022.1                                                                 |
| Ga0061065_12220                      | Plasmid segregation protein              | <i>srpM</i>              | LIQF01000022.1                                                                 |
| Ga0061065_12219                      | Hypothetical protein                     | <i>mobI</i>              | LIQF01000022.1                                                                 |
| Ga0061065_12218                      | DNA PolV/UmuCDNA repair protein          | <i>rumB</i>              | LIQF01000022.1                                                                 |
| Ga0061065_12217                      | DNA PolV/UmuDDNA repair protein          | <i>rumA</i>              | LIQF01000022.1                                                                 |
| Ga0061065_12216                      | Hypothetical protein                     | <i>s024</i>              | LIQF01000022.1                                                                 |
| Ga0061065_1221*                      | Conjugal transfer pilus assembly protein | <i>traI</i>              | LIQF01000022.1                                                                 |
| Ga0061065_1231*                      | Conjugal transfer pilus assembly protein | <i>traE</i>              | LIQF01000023.1                                                                 |
| Ga0061065_1232                       | Conjugal transfer pilus assembly protein | <i>traK</i>              | LIQF01000023.1                                                                 |
| Ga0061065_1233                       | Conjugal transfer pilus assembly protein | <i>traB</i>              | LIQF01000023.1                                                                 |
| Ga0061065_1234                       | Conjugal transfer pilus assembly protein | <i>traV</i>              | LIQF01000023.1                                                                 |

| ICEM <i>fu</i> Ind1b gene/ORF id | Putative gene product name                                      | SXT/R391 equivalent gene | GenBank accession no. of <i>M. fungiae</i> genomic scaffolds encoding the ICEs |
|----------------------------------|-----------------------------------------------------------------|--------------------------|--------------------------------------------------------------------------------|
| Ga0061065_1235                   | Conjugal transfer pilus assembly protein                        | <i>traA</i>              | LIQF01000023.1                                                                 |
| Ga0061065_1238                   | Thiol:disulfide interchange protein                             | <i>s054/dsbC</i>         | LIQF01000023.1                                                                 |
| Ga0061065_1239                   | Type-IV secretion system protein                                | <i>traC</i>              | LIQF01000023.1                                                                 |
| Ga0061065_12310                  | Conserved hypothetical protein                                  | <i>orf92</i>             | LIQF01000023.1                                                                 |
| Ga0061065_12311                  | Conjugal transfer pilin signal peptidase                        | <i>trhF</i>              | LIQF01000023.1                                                                 |
| Ga0061065_12312                  | Conjugal transfer pilus assembly protein                        | <i>traW</i>              | LIQF01000023.1                                                                 |
| Ga0061065_12313                  | Conjugal transfer pilus assembly protein                        | <i>traU</i>              | LIQF01000023.1                                                                 |
| Ga0061065_12314                  | Conjugal transfer pilus assembly protein                        | <i>traN</i>              | LIQF01000023.1                                                                 |
| Ga0061065_12321                  | Hypothetical protein                                            | <i>s063</i>              | LIQF01000023.1                                                                 |
| Ga0061065_12322                  | Hypothetical protein                                            | <i>s089</i>              | LIQF01000023.1                                                                 |
| Ga0061065_12323                  | Single strand binding protein                                   | <i>ssb</i>               | LIQF01000023.1                                                                 |
| Ga0061065_12324                  | Phage recombination protein                                     | <i>bet</i>               | LIQF01000023.1                                                                 |
| Ga0061065_12325                  | Hypothetical protein                                            | <i>orfZ</i>              | LIQF01000023.1                                                                 |
| Ga0061065_12326                  | Putative phage-type endonuclease                                | <i>exo</i>               | LIQF01000023.1                                                                 |
| Ga0061065_12327                  | Cobaltochelataase, CobS                                         | <i>s067</i>              | LIQF01000023.1                                                                 |
| Ga0061065_12328                  | Hypothetical protein                                            | <i>s088</i>              | LIQF01000023.1                                                                 |
| Ga0061065_13011                  | von Willebrand factor type-A domain containing protein          | <i>s070</i>              | LIQF01000030.1                                                                 |
| Ga0061065_13010                  | RadC-like JAB domain                                            | <i>s071</i>              | LIQF01000030.1                                                                 |
| Ga0061065_1309                   | Hypothetical protein                                            | <i>s092</i>              | LIQF01000030.1                                                                 |
| Ga0061065_1308                   | Uncharacterized domain associated with phage or plasmid primase | <i>s072</i>              | LIQF01000030.1                                                                 |
| Ga0061065_1307                   | Hypothetical protein                                            | <i>s073</i>              | LIQF01000030.1                                                                 |
| Ga0061065_1303                   | Conjugal transfer pilus assembly protein                        | <i>traF</i>              | LIQF01000030.1                                                                 |
| Ga0061065_1302                   | Conjugal transfer pilus assembly protein                        | <i>traH</i>              | LIQF01000030.1                                                                 |
| Ga0061065_1301*                  | TraG-like protein, N-terminal region                            | <i>traG</i>              | LIQF01000030.1                                                                 |
| Ga0061065_109135*                | Conjugal transfer mating pair stabilization protein             | <i>traG</i>              | LIQF01000009.1                                                                 |
| Ga0061065_109134                 | Entry exclusion protein                                         | <i>eex</i>               | LIQF01000009.1                                                                 |
| Ga0061065_109133                 | Flagellar transcriptional activator (FlhC)                      | <i>setC</i>              | LIQF01000009.1                                                                 |
| Ga0061065_109132                 | Flagellar transcriptional activator (FlhD)                      | <i>setD</i>              | LIQF01000009.1                                                                 |
| Ga0061065_109131                 | Transglycosylase SLT domain containing protein                  | <i>s082</i>              | LIQF01000009.1                                                                 |
| Ga0061065_109130                 | Hypothetical protein                                            | <i>s083</i>              | LIQF01000009.1                                                                 |
| Ga0061065_109129                 | Hypothetical protein                                            | <i>s084</i>              | LIQF01000009.1                                                                 |
| Ga0061065_109128                 | Putative antitoxin of toxin-antitoxin system                    | <i>croS/setQ</i>         | LIQF01000009.1                                                                 |
| Ga0061065_109127                 | Phage repressor protein                                         | <i>setR</i>              | LIQF01000009.1                                                                 |

71 (C) Core genes in ICE*MprChn1*

| ICEMprChn1 gene/ORF id | Putative gene product name                  | SXT/R391 equivalent gene | GenBank accession no. of <i>M. profundimaris</i> D104 genomic scaffolds encoding the ICEs |
|------------------------|---------------------------------------------|--------------------------|-------------------------------------------------------------------------------------------|
| D104_12225             | Cro/C1-type helix-turn-helix domain         | <i>hipB</i>              | AYOZ01000034.1                                                                            |
| D104_12220             | Serine/threonine-protein kinase HipA        | <i>hipA</i>              | AYOZ01000034.1                                                                            |
| D104_12210             | Transcriptional regulator, AlpA family      | <i>xis</i>               | AYOZ01000034.1                                                                            |
| D104_12205             | Integrase                                   | <i>int</i>               | AYOZ01000034.1                                                                            |
| D104_12200             | Hypothetical protein                        | <i>srpR</i>              | AYOZ01000034.1                                                                            |
| D104_12195             | Plasmid segregation protein                 | <i>srpM</i>              | AYOZ01000034.1                                                                            |
| D104_12190             | Hypothetical protein                        | <i>mobI</i>              | AYOZ01000034.1                                                                            |
| D104_12185             | DNA PolV/UmuCDNA repair protein             | <i>rumB</i>              | AYOZ01000034.1                                                                            |
| D104_12180             | DNA PolV/UmuCDNA repair protein, N-terminal | <i>rumB</i>              | AYOZ01000034.1                                                                            |
| D104_12175             | DNA PolV/UmuDDNA repair protein             | <i>rumA</i>              | AYOZ01000034.1                                                                            |
| D104_09920             | DNA polymerase-3 subunit epsilon            | <i>s024</i>              | AYOZ01000017.1                                                                            |
| D104_09925             | Hypothetical protein                        | <i>s025</i>              | AYOZ01000017.1                                                                            |
| D104_09930             | WYL domain containing protein               | <i>s026</i>              | AYOZ01000017.1                                                                            |
| D104_09960             | Conjugal transfer pilus assembly protein    | <i>traI</i>              | AYOZ01000017.1                                                                            |
| D104_09965             | Conjugal transfer pilus assembly protein    | <i>traD</i>              | AYOZ01000017.1                                                                            |
| D104_09970             | Conjugal transfer pilus assembly protein    | <i>s091</i>              | AYOZ01000017.1                                                                            |
| D104_09975             | Conjugal transfer pilus assembly protein    | <i>s043/traJ</i>         | AYOZ01000017.1                                                                            |
| D104_10460             | Conjugal transfer pilus assembly protein    | <i>traL</i>              | AYOZ01000022.1                                                                            |
| D104_10465             | Conjugal transfer pilus assembly protein    | <i>traE</i>              | AYOZ01000022.1                                                                            |
| D104_10470             | Conjugal transfer pilus assembly protein    | <i>traK</i>              | AYOZ01000022.1                                                                            |
| D104_10475             | Conjugal transfer pilus assembly protein    | <i>traB</i>              | AYOZ01000022.1                                                                            |
| D104_10480             | Conjugal transfer pilus assembly protein    | <i>traV</i>              | AYOZ01000022.1                                                                            |
| D104_10485             | Conjugal transfer pilus assembly protein    | <i>traA</i>              | AYOZ01000022.1                                                                            |
| D104_04230             | Thiol:disulfide interchange protein         | <i>s054/dsbC</i>         | AYOZ01000004.1                                                                            |
| D104_04225             | Type-IV secretion system protein            | <i>traC</i>              | AYOZ01000004.1                                                                            |
| D104_04220             | Conserved hypothetical protein              | <i>orf92</i>             | AYOZ01000004.1                                                                            |
| D104_04215             | Conjugal transfer pilin signal peptidase    | <i>trhF</i>              | AYOZ01000004.1                                                                            |
| D104_04210             | Conjugal transfer pilus assembly protein    | <i>traW</i>              | AYOZ01000004.1                                                                            |
| D104_04205             | Conjugal transfer pilus assembly protein    | <i>traU</i>              | AYOZ01000004.1                                                                            |
| D104_04200             | Conjugal transfer pilus assembly protein    | <i>traN</i>              | AYOZ01000004.1                                                                            |
| D104_04185             | Hypothetical protein                        | <i>s063</i>              | AYOZ01000004.1                                                                            |
| D104_04180             | Hypothetical protein                        | <i>s089</i>              | AYOZ01000004.1                                                                            |
| D104_04175             | Single strand binding protein               | <i>ssb</i>               | AYOZ01000004.1                                                                            |



| ICEM <sub>pr</sub> Chn1 gene/ORF id | Putative gene product name                             | SXT/R391 equivalent gene | GenBank accession no. of <i>M. profundimaris</i> D104 genomic scaffolds encoding the ICEs |
|-------------------------------------|--------------------------------------------------------|--------------------------|-------------------------------------------------------------------------------------------|
| D104_04170                          | Phage recombination protein                            | <i>bet</i>               | AYOZ01000004.1                                                                            |
| D104_04165                          | Hypothetical protein                                   | <i>orfZ</i>              | AYOZ01000004.1                                                                            |
| D104_04160                          | Putative phage-type endonuclease                       | <i>exo</i>               | AYOZ01000004.1                                                                            |
| D104_04155                          | Cobaltochelataase, CobS                                | <i>s067</i>              | AYOZ01000004.1                                                                            |
| D104_04150                          | Hypothetical protein                                   | <i>s088</i>              | AYOZ01000004.1                                                                            |
| D104_04145                          | Protein of unknown function (DUF3150)                  | <i>s068</i>              | AYOZ01000004.1                                                                            |
| D104_04140                          | Hypothetical protein                                   | <i>s069</i>              | AYOZ01000004.1                                                                            |
| D104_04135                          | von Willebrand factor type-A domain containing protein | <i>s070</i>              | AYOZ01000004.1                                                                            |
| D104_04130                          | RadC-like JAB domain                                   | <i>s071</i>              | AYOZ01000004.1                                                                            |
| D104_04125                          | Hypothetical protein                                   | <i>s092</i>              | AYOZ01000004.1                                                                            |
| D104_04120                          | Plasmid primase                                        | <i>s072</i>              | AYOZ01000004.1                                                                            |
| D104_04110                          | Hypothetical protein                                   | <i>s073</i>              | AYOZ01000004.1                                                                            |
| D104_04105                          | Conjugal transfer pilus assembly protein               | <i>traF</i>              | AYOZ01000004.1                                                                            |
| D104_04100                          | Conjugal transfer pilus assembly protein               | <i>traH</i>              | AYOZ01000004.1                                                                            |
| D104_04095                          | Conjugal transfer mating pair stabilization protein    | <i>traG</i>              | AYOZ01000004.1                                                                            |
| D104_04090                          | Entry exclusion protein                                | <i>eex</i>               | AYOZ01000004.1                                                                            |
| D104_04085                          | Flagellar transcriptional activator (FlhC)             | <i>setC</i>              | AYOZ01000004.1                                                                            |
| D104_04080                          | Flagellar transcriptional activator (FlhD)             | <i>setD</i>              | AYOZ01000004.1                                                                            |
| D104_04075                          | Transglycosylase SLT domain containing protein         | <i>s082</i>              | AYOZ01000004.1                                                                            |
| D104_04070                          | Hypothetical protein                                   | <i>s083</i>              | AYOZ01000004.1                                                                            |
| D104_04065                          | Hypothetical protein                                   | <i>s084</i>              | AYOZ01000004.1                                                                            |
| D104_04060                          | Putative antitoxin of toxin-antitoxin system           | <i>croS/setQ</i>         | AYOZ01000004.1                                                                            |
| D104_04055                          | Phage repressor protein                                | <i>setR</i>              | AYOZ01000004.1                                                                            |

72

73 SXT/R391 ICE equivalent gene are based on TBLASTN homology search of genes in the two ICEs of *M. fungiae* with the  
74 corresponding proteins encoded by the SXT/R391 ICEs.

75 \*, partial sequence.

76

77

78

79

80



| Gene name          | ICEM <i>fu</i> Ind1a gene locus id | Percentage homology of predicted proteins with SXT/R391 ICE proteins |                    |                     |                     |                    |                    |                     |                     |                     |                     |                     |                    |                     |
|--------------------|------------------------------------|----------------------------------------------------------------------|--------------------|---------------------|---------------------|--------------------|--------------------|---------------------|---------------------|---------------------|---------------------|---------------------|--------------------|---------------------|
|                    |                                    | ICEM <i>fu</i> Ind1b                                                 | ICE <i>Pa</i> Ban1 | ICE <i>Pda</i> Spa1 | ICE <i>Pmi</i> Chn1 | R391               | ICE <i>Spu</i> PO1 | SXT <sup>MO10</sup> | ICE <i>Vch</i> Ban5 | ICE <i>Vch</i> Ind4 | ICE <i>Vch</i> Ind5 | ICE <i>Vch</i> Mex1 | ICE <i>Vf</i> Ind1 | ICEM <i>pr</i> Chn1 |
| <i>mfuind1a-14</i> | Ga0061065_11915                    | n.h                                                                  | n.h                | 97.35               | n.h                 | n.h                | n.h                | n.h                 | n.h                 | n.h                 | n.h                 | n.h                 | n.h                | n.h                 |
| <i>dsbC</i>        | Ga0061065_11914                    | 95.22                                                                | 95.22              | 95.22               | 95.65               | 95.65              | 95.65              | 95.65               | 95.22               | 95.65               | 95.22               | 95.22               | 95.65              | 95.65               |
| <i>traC</i>        | Ga0061065_11913                    | 95.74                                                                | 95.74              | 95.87               | 95.99               | 95.99              | 95.87              | 96.12               | 95.99               | 96.12               | 95.99               | 96.12               | 95.87              | 95.74               |
| <i>orf92</i>       | Ga0061065_11912                    | 84.35                                                                | 85.22              | ab                  | ab                  | ab                 | 85.22              | ab                  | 85.22               | 85.22               | 85.22               | 85.22               | 88.17              | 84.35               |
| <i>trhF</i>        | Ga0061065_11911                    | 84.62                                                                | 85.21              | 84.02               | 85.21               | 85.8               | 84.62              | 82.84               | 84.62               | 82.84               | 84.62               | 85.8                | 83.43              | 83.43               |
| <i>traW</i>        | Ga0061065_11910                    | 89.97                                                                | 91.03              | 89.45               | 90.77               | 90.24              | 89.71              | 90.5                | n.a                 | 90.5                | n.a                 | n.a                 | 91.03              | 91.03               |
| <i>traU</i>        | Ga0061065_1199                     | 92.98                                                                | 93.27              | 92.98               | 93.57               | 92.4               | 93.27              | 93.57               | 93.86               | 93.85               | 93.86               | 93.57               | 92.69              | 92.69               |
| <i>traN</i>        | Ga0061065_1198                     | 73.02                                                                | 73.02              | 73.02               | 73.27               | 72.94              | 72.86              | 73.35               | 72.53               | 73.02               | 72.53               | 72.94               | 73.02              | 73.11               |
| <i>mfuind1a-15</i> | Ga0061065_1197                     | n.h                                                                  | n.h                | n.h                 | n.h                 | n.h                | 79.37              | 80.62               | 81.94               | 80.62               | 81.94               | n.h                 | n.h                | n.h                 |
| <i>s063</i>        | Ga0061065_1196                     | 89.73                                                                | 89.19              | 89.19               | 89.73               | 88.11              | 90.22              | 89.19               | 88.11               | 89.19               | 88.11               | 88.65               | 87.03              | 87.03               |
| <i>s089</i>        | Ga0061065_1195                     | 69.44                                                                | 70.37              | 70.37               | ab                  | 70.37              | 69.44              | ab                  | 69.44               | 68.52               | 69.44               | 65.74               | 68.09              | 70.37               |
| <i>ssb</i>         | Ga0061065_1194                     | 91.37                                                                | 91.37              | 91.37               | 91.37               | 90.65              | 90.65              | 91.37               | 90.65               | 91.37               | 90.65               | 91.37               | 90.65              | 90.65               |
| <i>bet</i>         | Ga0061065_1193                     | 94.85                                                                | 94.49              | 94.85               | 94.85               | 94.85              | 94.85              | 94.49               | 94.85               | 94.49               | 94.85               | 94.85               | 94.49              | 94.85               |
| <i>exo</i>         | Ga0061065_1192                     | 97.93                                                                | 98.22              | 98.52               | 97.93               | 97.63              | 97.93              | 98.52               | 97.93               | 98.52               | 97.93               | 98.22               | 98.52              | 98.52               |
| <i>s067</i>        | Ga0061065_1191                     | 97                                                                   | 98                 | 97                  | 97                  | 97                 | 97                 | 96                  | 97                  | 96                  | 97                  | 97                  | 98                 | 98                  |
| <i>s073</i>        | Ga0061065_1331                     | 87.02                                                                | 87.02              | ab                  | 75.78               | 87.79              | 87.02              | 89.31               | 87.02               | 89.31               | 87.02               | 87.79               | 87.79              | 75.78               |
| <i>mfuind1a-16</i> | Ga0061065_1332                     | n.h                                                                  | n.h                | n.h                 | n.h                 | 98.3               | n.h                | n.h                 | n.h                 | n.h                 | n.h                 | n.h                 | n.h                | n.h                 |
| <i>traF</i>        | Ga0061065_1333                     | 93.31                                                                | 95.54              | 94.9                | 92.9                | 94.59              | 93.63              | 94.9                | 95.22               | 94.9                | 95.22               | 97.45               | 93.63              | 93.63               |
| <i>traH</i>        | Ga0061065_1334                     | 98.7                                                                 | 98.92              | 99.13               | 98.48               | 99.13              | 99.35              | 99.13               | 98.7                | 99.13               | 98.7                | 98.7                | 98.27              | 98.7                |
| <i>traG</i>        | Ga0061065_1335                     | 98.61                                                                | 100 <sup>#</sup>   | 100 <sup>#</sup>    | 100 <sup>#</sup>    | 100 <sup>#</sup>   | 100 <sup>#</sup>   | 100 <sup>#</sup>    | 100 <sup>#</sup>    | 100 <sup>#</sup>    | 100 <sup>#</sup>    | 100 <sup>#</sup>    | 100 <sup>#</sup>   | 100 <sup>#</sup>    |
| <i>traG</i>        | Ga0061065_11487                    | 100                                                                  | 98.3 <sup>#</sup>  | 98.47 <sup>#</sup>  | 98.56 <sup>#</sup>  | 97.54 <sup>#</sup> | 98.56 <sup>#</sup> | 98.56 <sup>#</sup>  | 98.3 <sup>#</sup>   | 98.56 <sup>#</sup>  | 98.3 <sup>#</sup>   | 98.47 <sup>#</sup>  | 98.3 <sup>#</sup>  | 98.98 <sup>#</sup>  |
| <i>eex</i>         | Ga0061065_11486                    | 87.41                                                                | 61.54              | 85.31               | 87.41               | 60.56              | 87.41              | 85.31               | 60.84               | 85.31               | 60.84               | 60.14               | 86.71              | 87.41               |
| <i>setC</i>        | Ga0061065_11485                    | 85.06                                                                | 85.06              | 85.06               | 85.06               | 85.06              | 85.06              | 85.06               | 85.06               | 85.63               | 85.06               | 85.06               | 85.06              | 85.06               |
| <i>setD</i>        | Ga0061065_11484                    | 90.91                                                                | 89.9               | 90.91               | 90.91               | 90.91              | 89.9               | 90.91               | 89.9                | 90.91               | 89.9                | 88.89               | 89.9               | 90.91               |
| <i>s082</i>        | Ga0061065_11483                    | 75.12                                                                | 75.27              | ab                  | 75.27               | 75.82              | 75.27              | 75.27               | 75.27               | 75.27               | 75.27               | n.a                 | 75.27              | 75.82               |
| <i>s083</i>        | Ga0061065_11482                    | 81.91                                                                | 80.79              | 80.54               | 72.38               | 80                 | 80.79              | 72.38 <sup>#</sup>  | 80.79               | 80.79               | 80.79               | n.a                 | 80.3               | 80.3                |
| <i>s083</i>        | Ga0061065_11482                    | -                                                                    | -                  | -                   | -                   | -                  | -                  | 88.76 <sup>#</sup>  | -                   | -                   | -                   | -                   | -                  | -                   |
| <i>s084</i>        | Ga0061065_11481                    | 86.97                                                                | 87.68              | 88.03               | 88.03 <sup>#</sup>  | 88.38              | 86.97              | 83.93               | 87.68               | 87.32               | 87.68               | 88.03               | 88.03              | 87.68               |
| <i>s084</i>        | Ga0061065_11481                    | -                                                                    | -                  | -                   | 84.52 <sup>#</sup>  | -                  | -                  | -                   | -                   | -                   | -                   | -                   | -                  | -                   |
| <i>croS/setQ</i>   | Ga0061065_11480                    | 75                                                                   | 76.32              | 76.32               | 76.32               | n.h                | 75                 | 76.32               | 76.32               | 76.32               | 76.32               | 75                  | 76.32              | 76.32               |
| <i>setR</i>        | Ga0061065_11479                    | 78.14                                                                | 78.14              | 78.14               | 78.14               | 78.14              | 78.14              | 78.14               | 78.14               | 78.14               | 78.14               | 78.14               | 78.14              | 78.14               |

90

91

92

93

94

95

96

97

98

## 99 (B) Homology of ICEMfuInd1b with other SXT/R391 ICEs

| Gene name          | ICEMfuInd1b gene locus id | Percentage homology of predicted proteins with SXT/R391 ICE proteins |                    |                    |                   |                    |                     |                    |                    |                    |                    |                    |                    |
|--------------------|---------------------------|----------------------------------------------------------------------|--------------------|--------------------|-------------------|--------------------|---------------------|--------------------|--------------------|--------------------|--------------------|--------------------|--------------------|
|                    |                           | ICEPalBan1                                                           | ICEPdaSpa1         | ICEPmiChn1         | R391              | ICESpuPO1          | SXT <sup>MO10</sup> | ICEVchBan5         | ICEVchInd4         | ICEVchInd5         | ICEVchMex1         | ICEVfInd1          | ICEMprChn1         |
| <i>int</i>         | Ga0061065_12222           | 99.75                                                                | 99.49              | 99.75              | 99.49             | 99.75              | 99.24               | 99.75              | 99.24              | 99.75              | 100                | 99.75              | 98.98              |
| <i>s002</i>        | Ga0061065_12221           | 95.51                                                                | 97.75              | 98.88              | 96.63             | 95.51              | 98.88               | 92.98              | 98.88              | 95.51              | 93.26              | 95.51              | 96.63              |
| <i>s003</i>        | Ga0061065_12220           | 99.38                                                                | 98.77              | 99.38              | 99.38             | 98.77              | 98.77               | 99.38              | 98.77              | 99.38              | 98.46              | 99.38              | 99.07              |
| <i>mobI</i>        | Ga0061065_12219           | 97.87                                                                | ab                 | ab                 | ab                | 99.29              | ab                  | 97.87              | 98.58              | 97.87              | 98.58              | 97.87              | 98.58              |
| <i>rumB</i>        | Ga0061065_12218           | 91.76 <sup>#</sup>                                                   | ab                 | 91.76 <sup>#</sup> | 97.01             | 96.92              | 91.49 <sup>#</sup>  | 91.76 <sup>#</sup> | 91.49 <sup>#</sup> | 91.76 <sup>#</sup> | 96.81              | 91.76 <sup>#</sup> | 97.07 <sup>#</sup> |
| <i>rumB</i>        | Ga0061065_12218           | 97.44 <sup>#</sup>                                                   | -                  | 95.6 <sup>#</sup>  | -                 | -                  | 95.79 <sup>#</sup>  | 98.72 <sup>#</sup> | 98.72 <sup>#</sup> | 98.72 <sup>#</sup> | -                  | 98.72 <sup>#</sup> | 98.7 <sup>#</sup>  |
| <i>rumA</i>        | Ga0061065_12217           | 97.99                                                                | 97.32              | 97.32              | 98.66             | 99.33              | 98.66               | 98.66              | 98.66              | 98.66              | 98.66              | 98.66              | 98.66              |
| <i>s024</i>        | Ga0061065_12216           | 84.52                                                                | 85.71              | 83.33              | 85.71             | 84.52              | 84.52               | 84.52              | 84.52              | 84.52              | 85.71              | 84.52              | 85.71              |
| <i>Mfuind1b-11</i> | Ga0061065_1225            | n.h                                                                  | n.h                | n.h                | n.h               | n.h                | n.h                 | n.h                | n.h                | n.h                | n.h                | n.h                | 61.46              |
| <i>Mfuind1b-11</i> | Ga0061065_1224            | n.h                                                                  | n.h                | n.h                | n.h               | n.h                | n.h                 | n.h                | n.h                | n.h                | n.h                | n.h                | 97.85              |
| <i>traI</i>        | Ga0061065_1221            | 93.92                                                                | 92                 | 93.44              | 92.96             | 93.44              | 91.68               | 92.8               | 91.68              | 92.8               | 92.64              | n.a                | 92                 |
| <i>traE</i>        | Ga0061065_1231            | 98.56                                                                | 99.04              | 99.23              | 99.23             | 99.04              | 98.56               | 99.04              | 98.56              | 99.04              | 98.08              | 98.56              | 98.56              |
| <i>traK</i>        | Ga0061065_1232            | 95.97                                                                | 96.32              | 95.32              | 95.65             | 96.32              | 95.32               | 95.3               | 95.3               | 95.3               | 94.63              | 96.64              | 96.66              |
| <i>traB</i>        | Ga0061065_1233            | 99.07                                                                | 99.77              | 98.37              | 99.53             | 98.14              | 98.83               | 99.53              | 98.83              | 99.53              | 98.6               | n.a                | 99.53              |
| <i>traV</i>        | Ga0061065_1234            | 96.84                                                                | 96.84              | 97.37              | 97.89             | 97.37              | 96.84               | 97.89              | 96.84              | 97.89              | 97.89              | 96.24              | 96.32              |
| <i>traA</i>        | Ga0061065_1235            | 99.22                                                                | 99.22              | 98.44              | 98.44             | 97.66              | 99.22               | 96.88              | 99.22              | 96.88              | 98.44              | 97.66              | 98.44              |
| <i>mfuind1b-15</i> | Ga0061065_1236            | n.h                                                                  | n.h                | n.h                | 96.23             | n.h                | n.h                 | n.h                | n.h                | n.h                | 92.86              | n.h                | n.h                |
| <i>mfuind1b-16</i> | Ga0061065_1237            | n.h                                                                  | n.h                | n.h                | 98.86             | n.h                | n.h                 | n.h                | n.h                | n.h                | 98.86              | n.h                | n.h                |
| <i>dsbC</i>        | Ga0061065_1238            | 99.13                                                                | 99.13              | 99.57              | 99.57             | 99.57              | 99.57               | 99.13              | 99.57              | 99.13              | 99.13              | 99.57              | 99.57              |
| <i>traC</i>        | Ga0061065_1239            | 99                                                                   | 99.12              | 99.25              | 99.25             | 99.12              | 99.25               | 99.25              | 99.25              | 99.25              | 99.37              | 99.12              | 99                 |
| <i>orf92</i>       | Ga0061065_12310           | 97.39                                                                | ab                 | ab                 | ab                | 98.26              | ab                  | 97.39              | 97.39              | 97.39              | 97.39              | 97.85              | 96.52              |
| <i>trhF</i>        | Ga0061065_12311           | 98.82                                                                | 97.06              | 98.24              | 98.77             | 97.06              | 98.24               | 98.82              | 98.24              | 98.82              | 97.65              | 96.47              | 96.47              |
| <i>traW</i>        | Ga0061065_12312           | 95.99                                                                | 95.72              | 97.06              | 96.52             | 94.92              | 96.26               | n.a                | 96.26              | n.a                | n.a                | 95.72              | 95.72              |
| <i>traU</i>        | Ga0061065_12313           | 98.54                                                                | 98.83              | 98.83              | 98.25             | 98.54              | 98.83               | 98.83              | 99.08              | 98.83              | 99.42              | 99.12              | 99.12              |
| <i>traN</i>        | Ga0061065_12314           | 98.13                                                                | 98.29              | 98.13              | 97.89             | 97.89              | 97.91               | 97.56              | 97.8               | 97.56              | 96.67              | 98.46              | 98.54              |
| <i>s063</i>        | Ga0061065_12321           | 98                                                                   | 98.5               | 98                 | 98                | 97.5               | 98.5                | 97.5               | 98.5               | 97.5               | 98.5               | 97                 | 97                 |
| <i>s089</i>        | Ga0061065_12322           | 99.07                                                                | 95.37              | ab                 | 98.15             | 99.07              | ab                  | 92.59              | 97.22              | 92.59              | 93.52              | 98.94              | 99.07              |
| <i>ssb</i>         | Ga0061065_12323           | 97.84                                                                | 100                | 100                | 97.84             | 99.28              | 96.4                | 97.12              | 96.4               | 97.12              | 98.56              | 99.28              | 99.28              |
| <i>bet</i>         | Ga0061065_12324           | 99.63                                                                | 100                | 100                | 100               | 99.63              | 99.63               | 100                | 99.63              | 100                | 100                | 99.63              | 100                |
| <i>orfZ</i>        | Ga0061065_12325           | 97.92                                                                | -                  | -                  | -                 | -                  | -                   | 96.53              | 99.31              | 96.53              | 98.61              | 97.92              | 93.62              |
| <i>exo</i>         | Ga0061065_12326           | 98.52                                                                | 98.82              | 98.82              | 98.52             | 98.82              | 98.82               | 98.82              | 98.82              | 98.82              | 98.52              | 98.82              | 98.82              |
| <i>s067</i>        | Ga0061065_12327           | 99.69                                                                | 99.37              | 99.69              | 99.06             | 99.37              | 99.69               | 99.37              | 99.69              | 99.37              | 99.69              | 99.37              | 99.69              |
| <i>s088</i>        | Ga0061065_12328           | 96.47                                                                | 96.08              | 99.22              | 96.86             | 96.86              | 89.31               | 96.47              | 97.24              | 96.47              | 96.47              | 97.25              | 97.25              |
| <i>s070</i>        | Ga0061065_13011           | 97.56                                                                | 96.34              | 97.56              | 100               | 100                | 98.78               | 98.78              | 98.78              | 98.78              | 97.56              | 97.56              | 97.56              |
| <i>s071</i>        | Ga0061065_13010           | 96.36                                                                | 97.58              | 97.58              | 97.58             | 96.36              | 98.18               | 96.36              | 98.18              | 96.36              | 98.18              | 97.58              | 97.58              |
| <i>s092</i>        | Ga0061065_1309            | 95.58                                                                | ab                 | 94.69              | 92.92             | 97.35              | ab                  | 94.69              | 97.35              | 94.69              | 96.46              | 94.69              | 94.69              |
| <i>s072</i>        | Ga0061065_1308            | 96.64                                                                | 95.8               | 98.6               | 97.2              | 95.24              | 97.55               | 96.64              | 96.92              | 96.64              | 96.64              | 98.32              | 98.6               |
| <i>s073</i>        | Ga0061065_1307            | 89.79                                                                | ab                 | 84.91              | 89.36             | 89.79              | 91.49               | 90.21              | 91.49              | 90.21              | 90.21              | 90.17              | 84.91              |
| <i>traF</i>        | Ga0061065_1303            | 95.54                                                                | 95.22              | 93.87              | 97.77             | 96.82              | 95.86               | 95.22              | 95.86              | 95.22              | 93.31              | 96.5               | 94.59              |
| <i>traH</i>        | Ga0061065_1302            | 98.92                                                                | 98.7               | 98.27              | 98.7              | 98.92              | 99.13               | 98.7               | 99.13              | 98.7               | 98.7               | 97.84              | 98.48              |
| <i>traG</i>        | Ga0061065_1301            | 100 <sup>#</sup>                                                     | 100 <sup>#</sup>   | 100 <sup>#</sup>   | 100 <sup>#</sup>  | 100 <sup>#</sup>   | 100 <sup>#</sup>    | 100 <sup>#</sup>   | 100 <sup>#</sup>   | 100 <sup>#</sup>   | 100 <sup>#</sup>   | 100 <sup>#</sup>   | 100 <sup>#</sup>   |
| <i>traG</i>        | Ga0061065_109135          | 98.89 <sup>#</sup>                                                   | 99.17 <sup>#</sup> | 99.03 <sup>#</sup> | 97.5 <sup>#</sup> | 98.89 <sup>#</sup> | 98.89 <sup>#</sup>  | 98.89 <sup>#</sup> | 98.89 <sup>#</sup> | 98.89 <sup>#</sup> | 99.03 <sup>#</sup> | 98.75 <sup>#</sup> | 98.89 <sup>#</sup> |
| <i>eex</i>         | Ga0061065_109134          | 70.63                                                                | 95.8               | 97.9               | 69.72             | 96.5               | 96.5                | 69.93              | 96.5               | 69.93              | 69.23              | 97.2               | 96.5               |
| <i>setC</i>        | Ga0061065_109133          | 99.44                                                                | 100                | 99.44              | 99.44             | 100                | 98.87               | 99.44              | 99.44              | 99.44              | 100                | 99.44              | 100                |

| Gene name        | ICEMfuInd1b<br>gene locus id | Percentage homology of predicted proteins with SXT/R391 ICE proteins |            |                    |       |           |                     |            |            |            |            |            |            |
|------------------|------------------------------|----------------------------------------------------------------------|------------|--------------------|-------|-----------|---------------------|------------|------------|------------|------------|------------|------------|
|                  |                              | ICEPa/Ban1                                                           | ICEPdaSpa1 | ICEPmiChn1         | R391  | ICESpuPO1 | SXT <sup>M010</sup> | ICEVchBan5 | ICEVchInd4 | ICEVchInd5 | ICEVchMex1 | ICEVf/Ind1 | ICEMprChn1 |
| <i>s082</i>      | Ga0061065_109131             | 100                                                                  | ab         | 98.35              | 97.8  | 100       | 100                 | 100        | 100        | 100        | n.a        | 99.45      | 98.9       |
| <i>s083</i>      | Ga0061065_109130             | 99.09                                                                | 98.51      | 97.54              | 98.02 | 99.09     | 97.54               | 99.09      | 99.09      | 99.09      | n.a        | 98.18      | 98.64      |
| <i>s083</i>      | Ga0061065_109130             | -                                                                    | -          | -                  | -     | -         | 97.78 <sup>#</sup>  | -          | -          | -          | -          | -          | -          |
| <i>s084</i>      | Ga0061065_109129             | 98.62                                                                | 98.27      | 98.62 <sup>#</sup> | 98.27 | 99.65     | 99.42 <sup>#</sup>  | 98.62      | 98.96      | 98.62      | 98.62      | 98.62      | 96.89      |
| <i>s084</i>      | Ga0061065_109129             | -                                                                    | -          | 100 <sup>#</sup>   | -     | -         | -                   | -          | -          | -          | -          | -          | -          |
| <i>croS/setQ</i> | Ga0061065_109128             | 97.59                                                                | 97.59      | 96.39              | n.h   | 100       | 97.59               | 97.59      | 97.59      | 97.59      | 96.39      | 97.59      | 96.39      |
| <i>setR</i>      | Ga0061065_109127             | 100                                                                  | 100        | 100                | 100   | 100       | 100                 | 100        | 100        | 100        | 100        | 100        | 100        |
| <i>prfC</i>      | Ga0061065_109126             | n.a                                                                  | n.a        | 84.12              | n.a   | 78.64     | n.a                 | n.a        | n.a        | n.a        | 96.2       | 89.04      | 69.19      |

100

101 n.h, no homology based on BLASTP search with e-value cut-off of 1e-5, query coverage > 90 %, and identity > 40 %.

102 n.a, sequence not available.

103 <sup>#</sup>, partial protein sequences.

104 ab, absent or deleted.

105

106

107

108

109

110

111

112

113

114

115

116

117

118

119

120

121

122

123

124

125

126 **Supplementary Table S3.** Descriptions of genes or ORFs present in the hotspot regions of ICEMfuInd1a.  
 127

| Hotspot region      | ICEMfuInd1a gene/ORF id | Gene name   | Length (bp) | Hotspot gene product name                          | Accession no. of protein homolog in ICEberg database | % similarity with homolog |
|---------------------|-------------------------|-------------|-------------|----------------------------------------------------|------------------------------------------------------|---------------------------|
| HS-5<br>(s026-traI) | Ga0061065_11938         | mfuind1a-1  | 1560        | Type-I restriction enzyme M subunit                | <i>Vibrio cholerae</i> Mex1; ACV96414.1              | 96                        |
|                     | Ga0061065_11937         | mfuind1a-2  | 1245        | Type-I restriction enzyme S subunit                | <i>Vibrio cholerae</i> Mex1; ACV96472.1              | 41                        |
|                     | Ga0061065_11936         | mfuind1a-3  | 1176        | -                                                  | -                                                    | n.h                       |
|                     | Ga0061065_11935         | mfuind1a-4  | 3117        | Type-I restriction enzyme R subunit                | <i>Vibrio cholerae</i> Mex1; ACV96447.1              | 98                        |
|                     | Ga0061065_11934         | mfuind1a-5  | 564         | -                                                  | -                                                    | n.h                       |
|                     | Ga0061065_11933         | mfuind1a-6  | 912         | -                                                  | -                                                    | n.h                       |
| HS-1<br>(traJ-traL) | Ga0061065_11928         | mfuind1a-7  | 588         | Hypothetical protein                               | <i>Providencia rettgeri</i> ; AAM08045.1             | 96                        |
|                     | Ga0061065_11927         | mfuind1a-8  | 240         | Hypothetical protein                               | <i>Providencia rettgeri</i> ; AAM08045.1             | 96                        |
| HS-2<br>(traA-s054) | Ga0061065_11920         | mfuind1a-9  | 507         | Acetyltransferase (GNAT) family                    | <i>Vibrio cholerae</i> Mex1; ACV96420.1              | 96                        |
|                     | Ga0061065_11919         | mfuind1a-10 | 267         | Conserved hypothetical protein                     | <i>Vibrio cholerae</i> Mex1; ACV96425.1              | 95                        |
|                     | Ga0061065_11918         | mfuind1a-11 | 2730        | Hypothetical protein                               | <i>Vibrio cholerae</i> MJ-1236; ACQ61857.1           | 99                        |
|                     | Ga0061065_11917         | mfuind1a-12 | 1110        | Hypothetical protein                               | <i>Vibrio cholerae</i> MJ-1236; ACQ61856.1           | 98                        |
|                     | Ga0061065_11916         | mfuind1a-13 | 1533        | Hypothetical protein                               | <i>Vibrio cholerae</i> MJ-1236; ACQ61855.1           | 99                        |
|                     | Ga0061065_11915         | mfuind1a-14 | 1446        | Type 4 fimbriae expression regulatory protein pilR | <i>Vibrio cholerae</i> MJ-1236; ACQ61854.1           | 99                        |
| HS-4<br>(s073-traF) | Ga0061065_1197          | mfuind1a-15 | 693         | Endonuclease-1                                     | <i>Vibrio cholerae</i> Ind5; ACV96406.1              | 82                        |
| HS-3<br>(traN-s063) | Ga0061065_1332          | mfuind1a-16 | 1065        | Hypothetical protein                               | <i>Providencia rettgeri</i> ; AAM08049.1             | 98                        |

128  
 129 n.h, No homology

130  
 131  
 132  
 133  
 134  
 135  
 136  
 137

138 **Supplementary Table S4.** Descriptions of genes or ORFs present in the hotspot regions of ICE*Mfu*Ind1b.  
 139

| Hotspot region               | ICE <i>Mfu</i> Ind1b gene/ORF id | Gene name   | Length (bp) | Hotspot gene product name                                      | Accession no. of protein homolog in ICEberg database   | % similarity with homolog |
|------------------------------|----------------------------------|-------------|-------------|----------------------------------------------------------------|--------------------------------------------------------|---------------------------|
| HS-5<br>(s024- <i>traI</i> ) | Ga0061065_12215                  | mfuind1b-1  | 1038        | Transcriptional regulator, AraC family                         | <i>Polaromonas naphthalenivorans</i> CJ2; ABM39468.1   | 25                        |
|                              | Ga0061065_12214                  | mfuind1b-2  | 1485        | Putative gamma-glutamyl-gamma-aminobutyraldehyde dehydrogenase | <i>Klebsiella pneumoniae</i> 342; ACI07089.1           | 27                        |
|                              | Ga0061065_12213                  | mfuind1b-3  | 1779        | -                                                              | -                                                      | n.h                       |
|                              | Ga0061065_12212                  | mfuind1b-4  | 900         | DNA-binding transcriptional regulator, LysR                    | <i>Bordetella petrii</i> ; CAP41590.1                  | 35                        |
|                              | Ga0061065_12211                  | mfuind1b-5  | 1512        | Histidine ammonia lyase                                        | <i>Klebsiella pneumoniae</i> 342; ACI08660.1           | 32                        |
|                              | Ga0061065_12210                  | mfuind1b-6  | 2013        | -                                                              | -                                                      | n.h                       |
|                              | Ga0061065_1229                   | mfuind1b-7  | 1272        | -                                                              | -                                                      | n.h                       |
|                              | Ga0061065_1228                   | mfuind1b-8  | 1050        | -                                                              | -                                                      | n.h                       |
|                              | Ga0061065_1227                   | mfuind1b-9  | 240         | -                                                              | -                                                      | n.h                       |
|                              | Ga0061065_1226                   | mfuind1b-10 | 1254        | -                                                              | -                                                      | n.h                       |
|                              | Ga0061065_1225                   | mfuind1b-11 | 885         | Type-III restriction system methylase                          | <i>Bordetella petrii</i> ; CAP44585.1                  | 37                        |
|                              | Ga0061065_1224                   | mfuind1b-12 | 3078        | Type-III restriction enzyme                                    | <i>Bordetella petrii</i> ; CAP44586.1                  | 36                        |
|                              | Ga0061065_1223                   | mfuind1b-13 | 282         | -                                                              | -                                                      | n.h                       |
|                              | Ga0061065_1222                   | mfuind1b-14 | 474         | -                                                              | -                                                      | n.h                       |
| HS-1<br>( <i>traJ-traL</i> ) | Sequence not known               | -           | -           | -                                                              | -                                                      | -                         |
| HS-2<br>( <i>traA-s054</i> ) | Ga0061065_1236                   | mfuind1b-15 | 507         | Acetyltransferase (GNAT) family                                | <i>Vibrio cholerae</i> Mex1; ACV96420.1                | 93                        |
|                              | Ga0061065_1237                   | mfuind1b-16 | 267         | Conserved hypothetical protein                                 | <i>Vibrio cholerae</i> Mex1; ACV96425.1                | 99                        |
| HS-4<br>(s073- <i>traF</i> ) | Ga0061065_12315                  | mfuind1b-17 | 684         | -                                                              | -                                                      | n.h                       |
|                              | Ga0061065_12316                  | mfuind1b-18 | 897         | -                                                              | -                                                      | n.h                       |
|                              | Ga0061065_12317                  | mfuind1b-19 | 1131        | -                                                              | -                                                      | n.h                       |
|                              | Ga0061065_12318                  | mfuind1b-20 | 531         | -                                                              | -                                                      | n.h                       |
|                              | Ga0061065_12319                  | mfuind1b-21 | 1317        | Conserved hypothetical protein                                 | <i>Bordetella petrii</i> ; CAP41687.1                  | 22                        |
|                              | Ga0061065_12320                  | mfuind1b-22 | 324         | -                                                              | -                                                      | n.h                       |
| HS-3<br>( <i>traN-s063</i> ) | Ga0061065_1306                   | mfuind1b-23 | 1782        | Signal transduction GGDEF/EAL domain protein                   | <i>Burkholderia multivorans</i> ATCC 17616; BAG42888.1 | 33                        |
|                              | Ga0061065_1305                   | mfuind1b-24 | 2400        | Probable signaling protein                                     | <i>Bordetella petrii</i> ; CAP41698.1                  | 31                        |
|                              | Ga0061065_1304                   | mfuind1b-25 | 1557        | Hypothetical protein                                           | <i>Bordetella petrii</i> ; CAP41755.1                  | 37                        |

140  
 141 n.h, No homology  
 142

143  
 144  
 145  
 146  
 147

148 **Supplementary Table S5.** Descriptions of genes or ORFs present in the hotspot regions of ICE*MprChn1*.  
 149

| Hotspot region               | ICE <i>MprChn1</i> gene/ORF id | Gene name  | Length (bp)                    | Hotspot gene product name                                 | Accession no. of protein homolog in ICEberg database | % similarity with homolog |
|------------------------------|--------------------------------|------------|--------------------------------|-----------------------------------------------------------|------------------------------------------------------|---------------------------|
| HS-5<br>( <i>s026-traI</i> ) | D104_09935                     | mprchn1-1  | 3333                           | DNA-dependent ATPase, SNF2 family protein                 | <i>Bordetella petrii</i> ; CAP44583.1                | 41                        |
|                              | D104_09940                     | mprchn1-2  | 687                            | Hypothetical protein                                      | <i>Bordetella petrii</i> ; CAP44584.1                | 26                        |
|                              | D104_09945                     | mprchn1-3  | 1947                           | Type-III restriction system methylase                     | <i>Bordetella petrii</i> ; CAP44585.1                | 36                        |
|                              | D104_09950                     | mprchn1-4  | 3078                           | Type III restriction enzyme R subunit                     | <i>Bordetella petrii</i> ; CAP44586.1                | 36                        |
|                              | D104_09955                     | mprchn1-5  | 855                            | -                                                         | -                                                    | n.h                       |
| HS-1<br>( <i>traJ-traL</i> ) | D104_09980                     | mprchn1-6  | 1557                           | Transposase                                               | <i>Vibrio fluvialis</i> Ind1; ACV96587.1             | 99                        |
|                              | D104_09985                     | mprchn1-7  | 96                             | -                                                         | -                                                    | n.h                       |
|                              | D104_09995                     | mprchn1-8  | 219                            | -                                                         | -                                                    | n.h                       |
|                              | D104_10000                     | mprchn1-9  | 243                            | -                                                         | -                                                    | n.h                       |
|                              | D104_10005                     | mprchn1-10 | 708                            | -                                                         | -                                                    | n.h                       |
|                              | D104_10010                     | mprchn1-11 | 372                            | -                                                         | -                                                    | n.h                       |
|                              | D104_10015                     | mprchn1-12 | 693                            | TetR family transcriptional regulator                     | <i>Burkholderia xenovorans</i> LB400; ABE31807.1     | 30                        |
|                              | D104_10020                     | mprchn1-13 | 1047                           | Hypothetical protein                                      | <i>Bacteroides ovatus</i> ; CAD89793.1               | 28                        |
|                              | D104_10025                     | mprchn1-14 | 3042                           | Transporter, hydrophobe/amphiphile efflux-1 (HAE1) family | <i>Shewanella</i> sp. W3-18-1; ABM23977.1            | 25                        |
|                              | D104_10030                     | mprchn1-15 | 615                            | -                                                         | -                                                    | n.h                       |
|                              | D104_10035                     | mprchn1-16 | 234                            | -                                                         | -                                                    | n.h                       |
|                              | D104_10040                     | mprchn1-17 | 1305                           | Putative transposase                                      | <i>Streptococcus suis</i> SC84; CAZ51643.1           | 22                        |
|                              | D104_10445                     | mprchn1-18 | 1173                           | Conserved hypothetical protein                            | <i>Vibrio fluvialis</i> Ind1; ACV96594.1             | 99                        |
|                              | D104_10450                     | mprchn1-19 | 696                            | Transposition helper protein                              | <i>Vibrio fluvialis</i> Ind1; ACV96542.1             | 100                       |
| D104_10455                   | mprchn1-20                     | 573        | Conserved hypothetical protein | <i>Vibrio fluvialis</i> Ind1; ACV96517.1                  | 100                                                  |                           |
| HS-2<br>( <i>traA-s054</i> ) | D104_10490                     | mprchn1-21 | 834                            | Conserved hypothetical protein                            | <i>Vibrio fluvialis</i> Ind1; ACV96573.1             | 100                       |
|                              | D104_10495                     | mprchn1-22 | 702                            | Hypothetical protein                                      | <i>Vibrio cholera</i> ; AAL59716.1                   | 99                        |
|                              | D104_10500                     | mprchn1-23 | 408                            | MerR family transcriptional regulator                     | <i>Burkholderia xenovorans</i> LB400; ABE31843.1     | 99                        |
|                              | D104_10505                     | mprchn1-24 | 885                            | Heavy metal efflux pump, CDF family                       | <i>Burkholderia xenovorans</i> LB400; ABE31842.1     | 98                        |
| HS-4<br>( <i>s073-traF</i> ) | D104_04195                     | mprchn1-25 | 434                            | Hypothetical protein                                      | <i>Vibrio cholerae</i> MJ-1236; ACQ61846.1           | 99                        |
|                              | D104_04190                     | mprchn1-26 | 663                            | Hypothetical protein                                      | <i>Proteus mirabilis</i> ; BAI48432.1                | 100                       |

150  
 151 n.h, No homology

152  
 153
